# Supplementary material for: A Novel Orange-Red Emitting ZnB4O7:Eu3+Phosphor with Urchin-Like Nanostructure
Source: Hindawi journal article supplement (doi:10.1155/2015/797056), 2015-01-01
Supplement: f1 [file 797056.f1.pdf]

## Graphical abstract

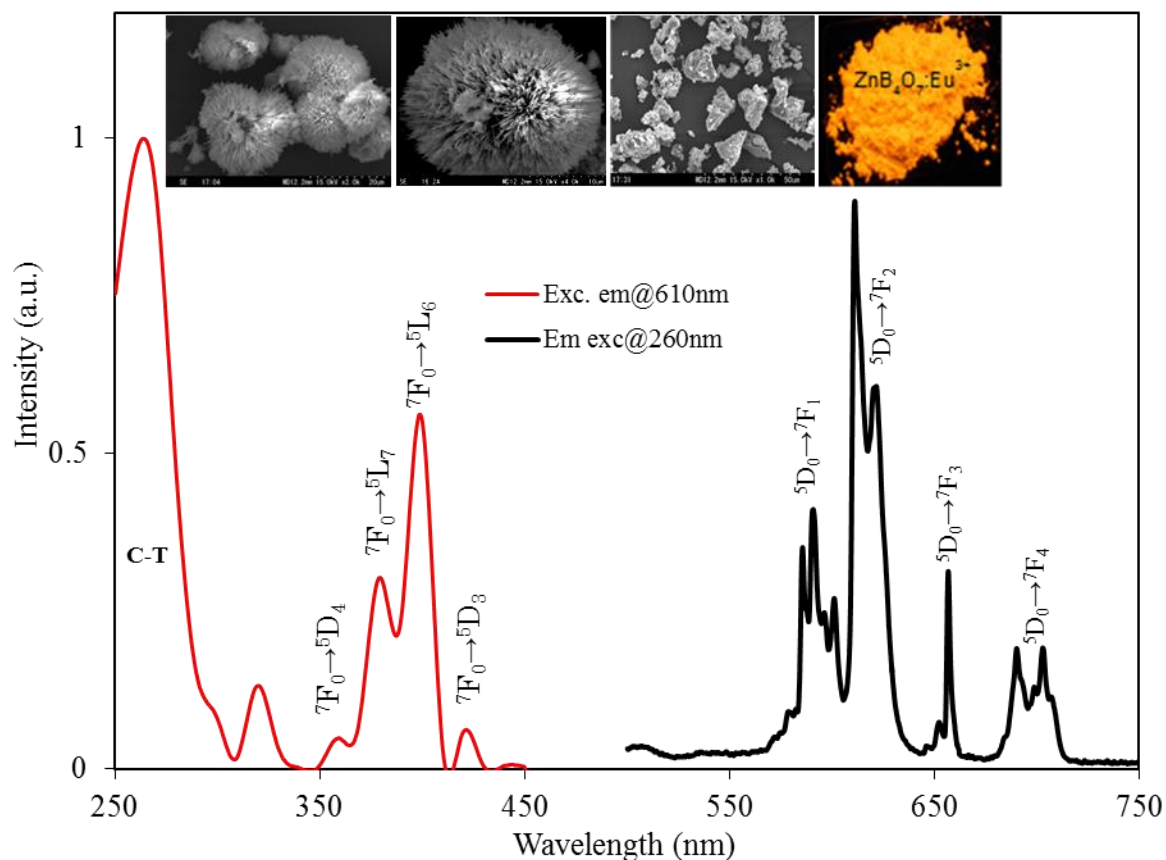

## Highlights

- $\text{ZnB}_4\text{O}_7:\text{Eu}^{3+}$  phosphor was synthesized by hydrothermal method for the first time.
- Urchin like nanostructure composed of nanorods was achieved during HT treatment.
- The nanorods are 200 to 400 nm while urchins are few  $\mu\text{m}$  to 40  $\mu\text{m}$ .
- Phase transition temperature from  $\text{ZnB}_4\text{O}_7$  to  $\text{ZnB}_2\text{O}_4$  was determined to be 798  $^\circ\text{C}$ .
- Bright orange-red emission was observed by UV or blue light excitation.
- High thermal stability and better absorbance was observed than the commercial red phosphor indicating good candidate for UV or blue light excited LEDs.
